# Supplementary material for: Molecular Detection and Genotyping of Enterocytozoon bieneusi in Black Goats (Capra hircus) in Yunnan Province, Southwestern China
Source: MDPI journal article supplement (doi:10.3390/ani11123387), 2021-11-26
Supplement: s1 [file s1]

**Table S1.** The primers of *Enterocytozoon bieneusi* used in this study.

| Locus | Primers | Sequences (5'→3')          | Length (bp) |
|-------|---------|----------------------------|-------------|
| ITS   | NEBF1   | GATGGTCATAGGGATGAAGAGCTT   | 390         |
|       | NEBR1   | TATGCTTAAGTCCAGGGAG        |             |
|       | NEBF2   | AGGGATGAAGAGCTTCGGCTCTG    |             |
|       | NEBR2   | AGTGATCCTGTATTAGGGATATT    |             |
| MS1   | MS1F1   | CAAGTTGCAAGTTCAGTGTGTTGAA  | 675         |
|       | MS1R1   | GATGAATATGCATCCATTGATGTT   |             |
|       | MS1F2   | TTGTAAATCGACCAAATGTGCTAT   |             |
|       | MS1R2   | GGACATAAACCACTAATTAATGTAAC |             |
| MS3   | MS3F1   | CAAGCACTGTGGTTACTGTT       | 537         |
|       | MS3R1   | AAGTTAGGGCATTTAATAAAAATTA  |             |
|       | MS3F2   | GTTCAAGTAATTGATACCAGTCT    |             |
|       | MS3R2   | CTCATTGAATCTAAATGTGTATAA   |             |
| MS4   | MS4F1   | GCATATCGTCTCATAGGAACA      | 885         |
|       | MS4R1   | GTTTCATGGTTATTAATTCCAGAA   |             |
|       | MS4F2   | CGAAGTGTACTACATGTCTCT      |             |
|       | MS4R2   | GGACTTTAATAAGTTACCTATAGT   |             |
| MS7   | MS7F1   | GTTGATCGTCCAGATGGAATT      | 471         |
|       | MS7R1   | GACTATCAGTATTACTGATTATAT   |             |
|       | MS7F2   | CAATAGTAAAGGAAGATGGTCA     |             |
|       | MS7R2   | CGTCGCTTTGTTTCATAATCTT     |             |
